# Supplementary material
Source: PubMed Central journal article supplement (PMC3956598)

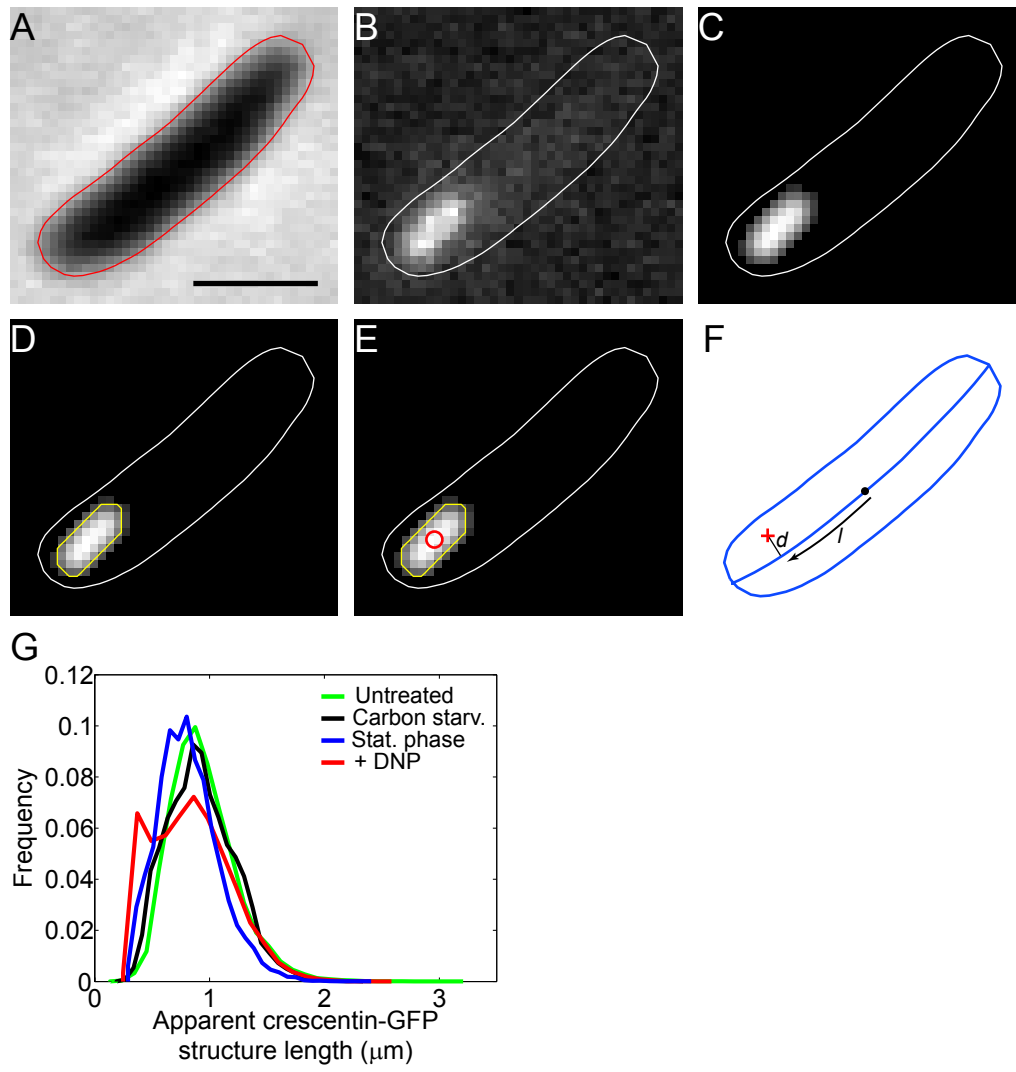

Figure S1

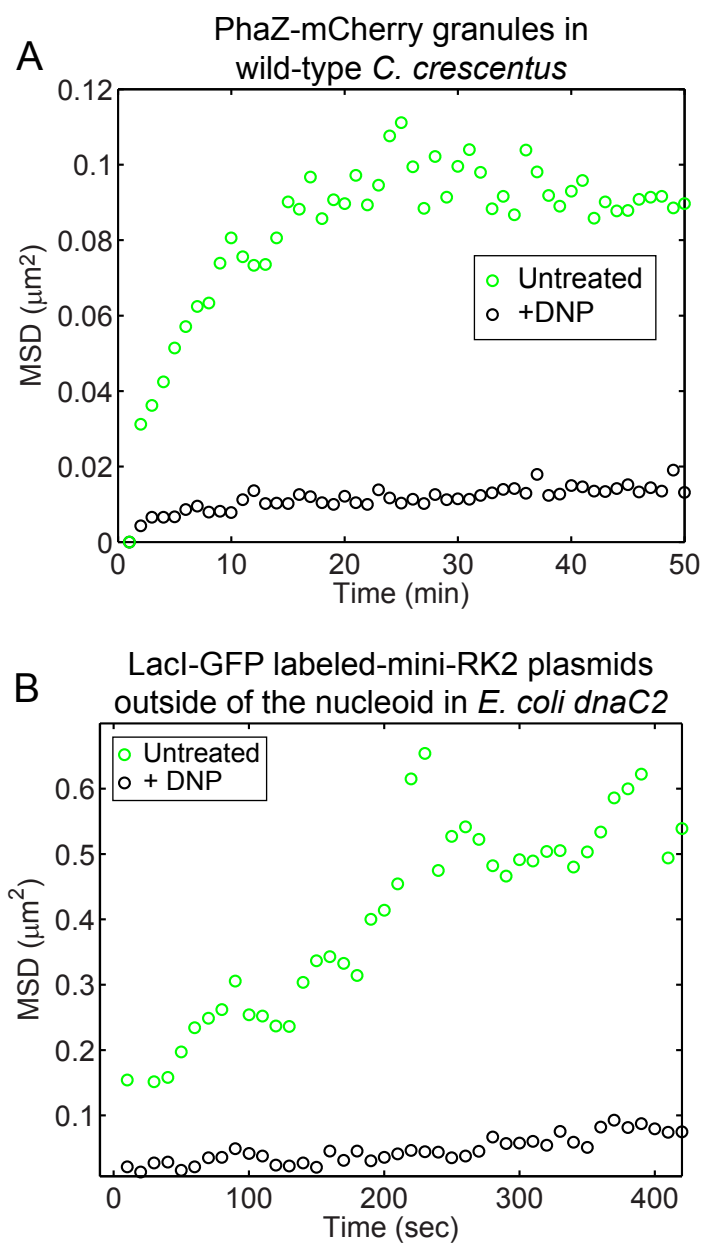

Figure S2

A

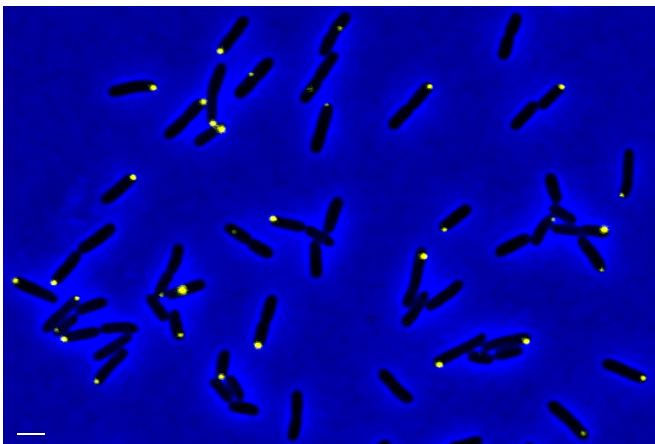

B

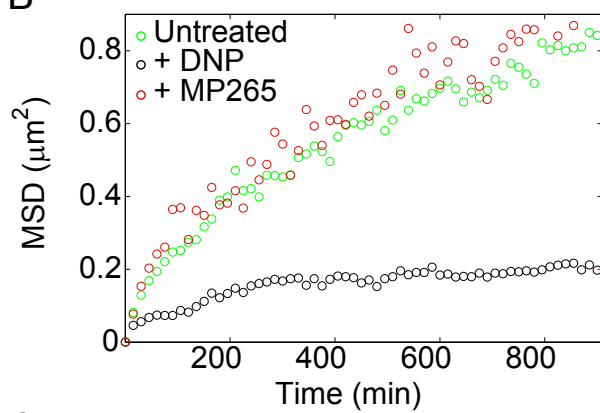

D

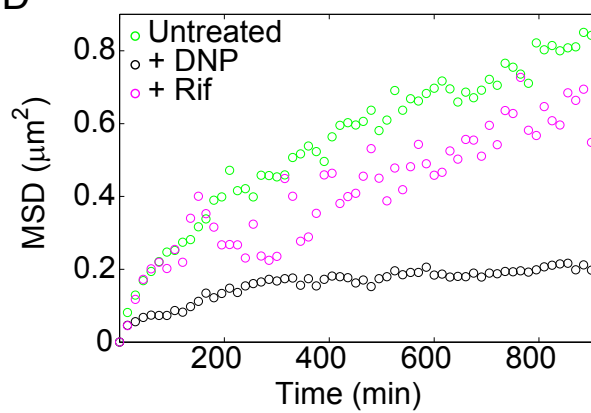

C

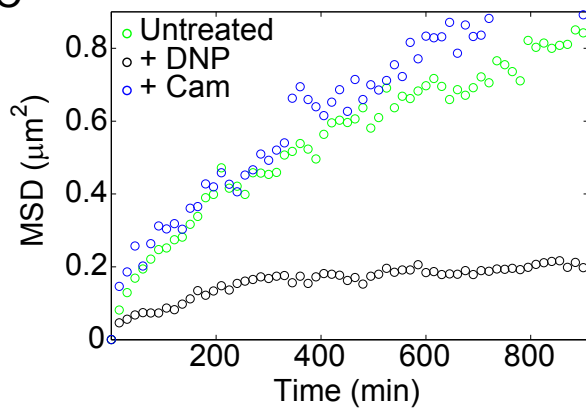

E

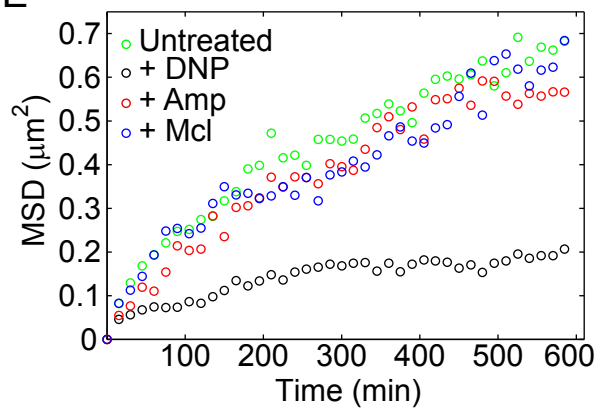

Figure S3

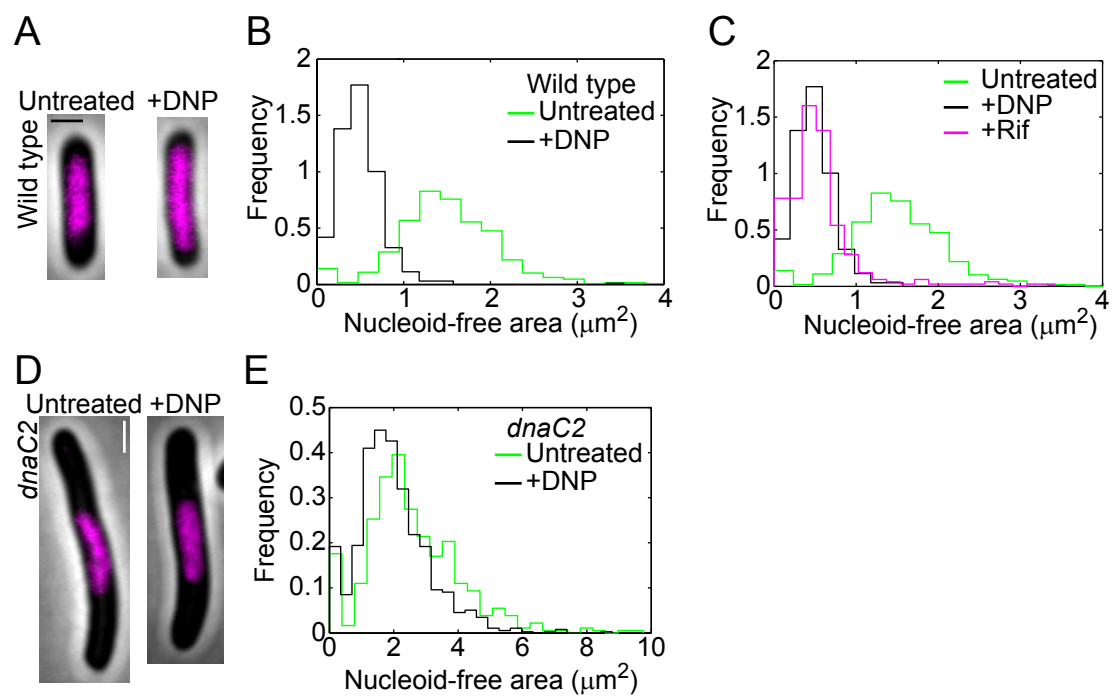

Figure S4

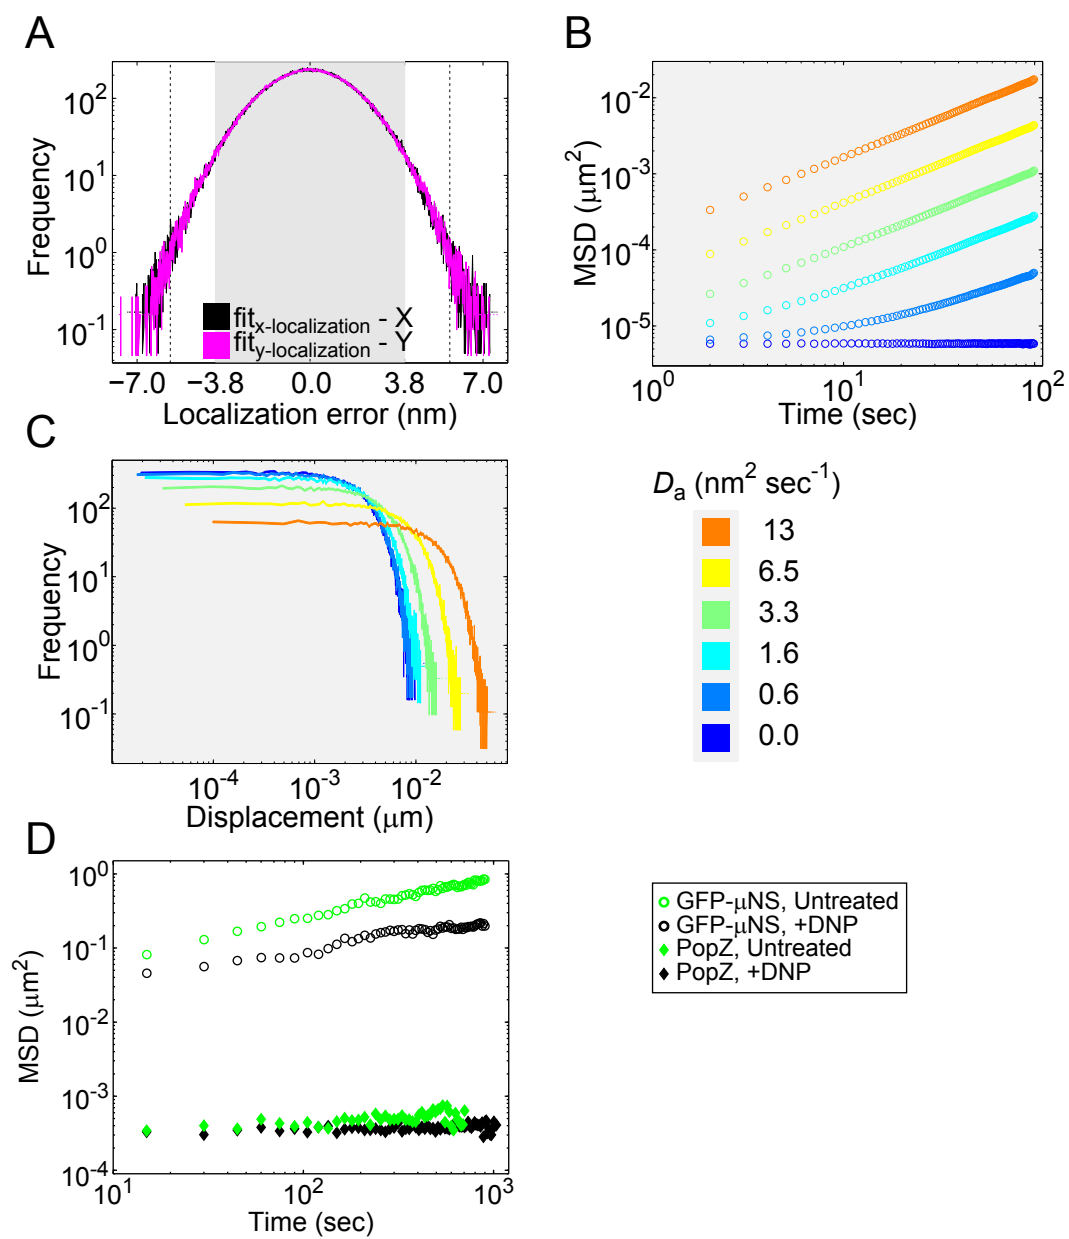

Figure S5

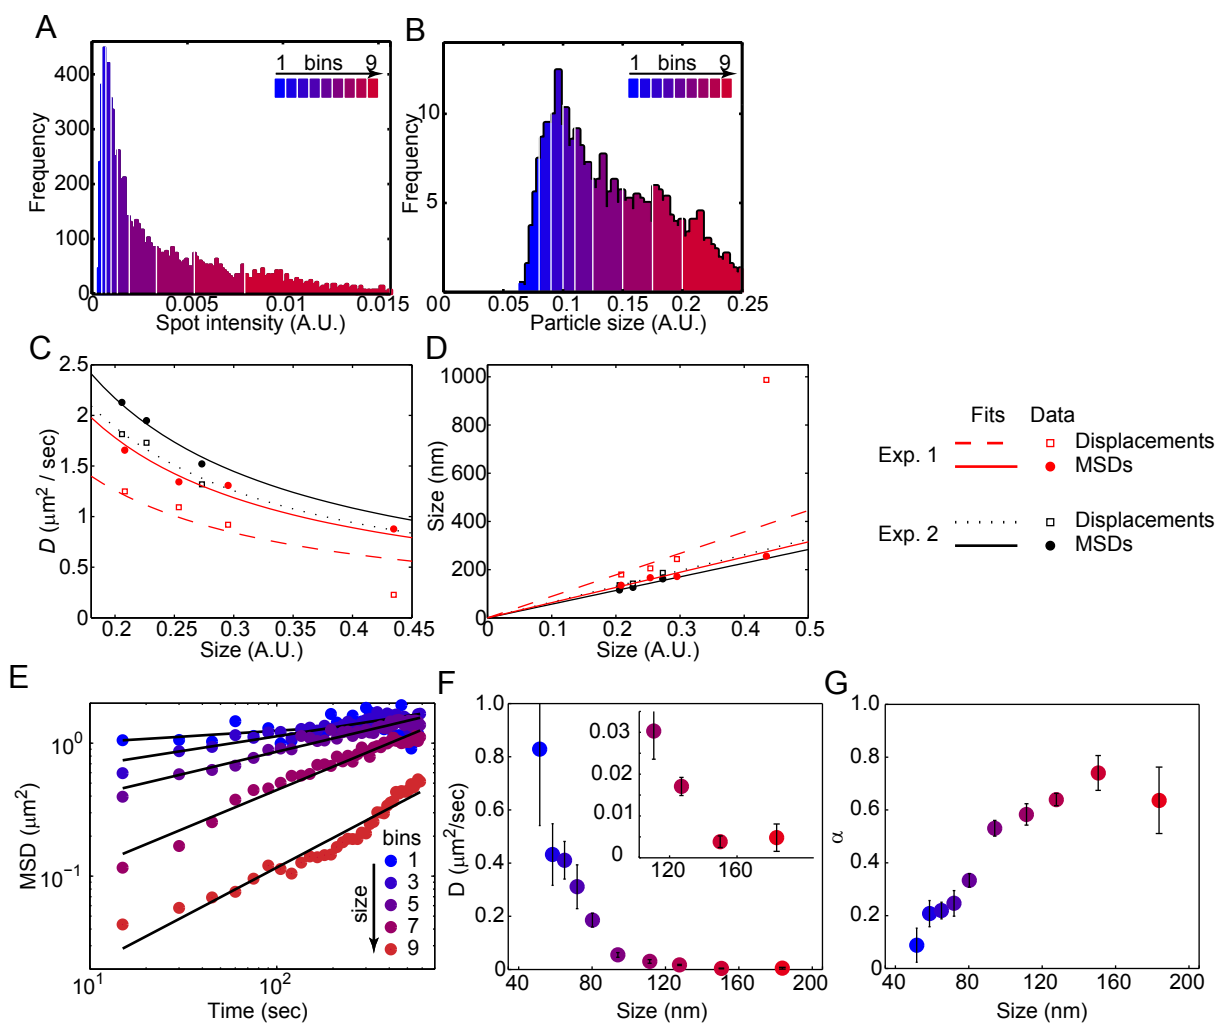

Figure S6

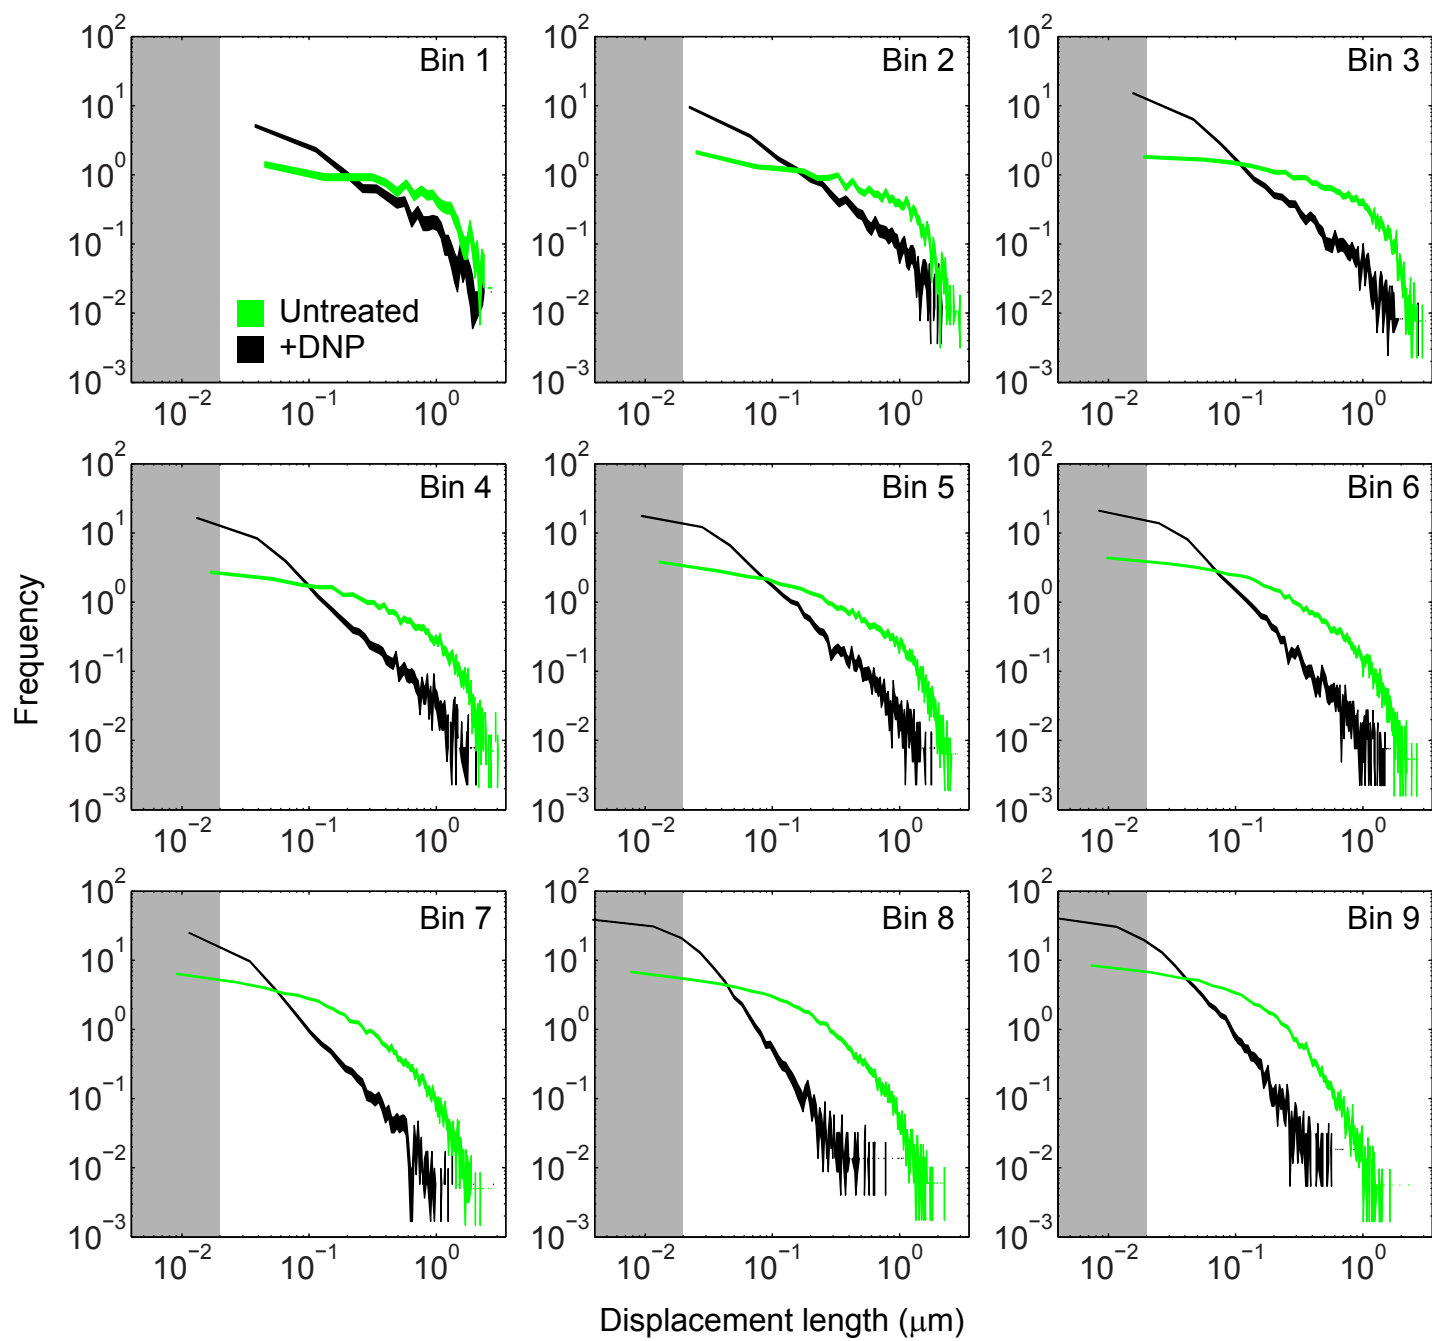

Figure S7

Supplement: NIHMS559716-supplement-09.pdf [file NIHMS559716-supplement-09.pdf]
